# Supplementary figures and images for: The fading of reported effectiveness. A meta-analysis of randomised controlled trials
Source: Springer Nature journal article supplement (doi:10.1186/1471-2288-6-25), 2006-05-11

**Pravastatin (n=64)**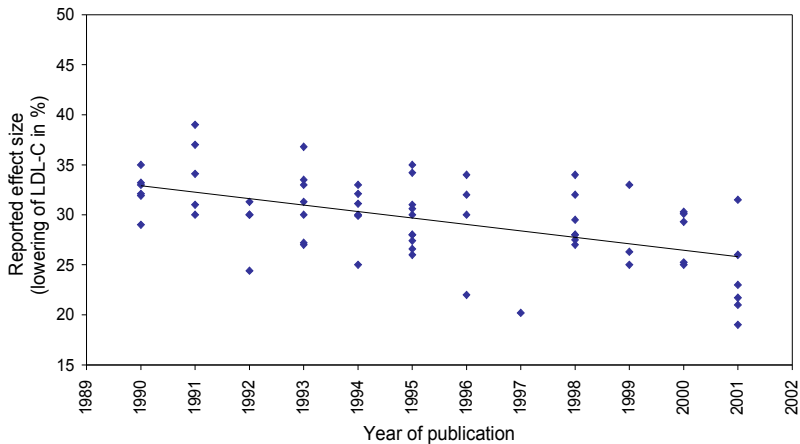**Atorvastatin (n=35)**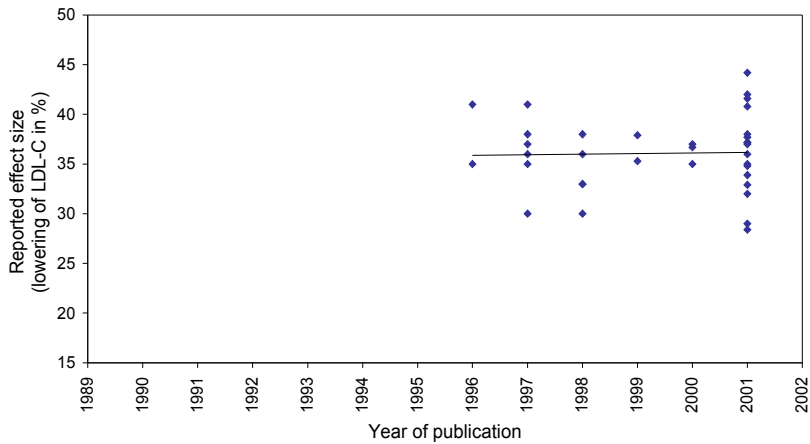**Timolol (n=75)**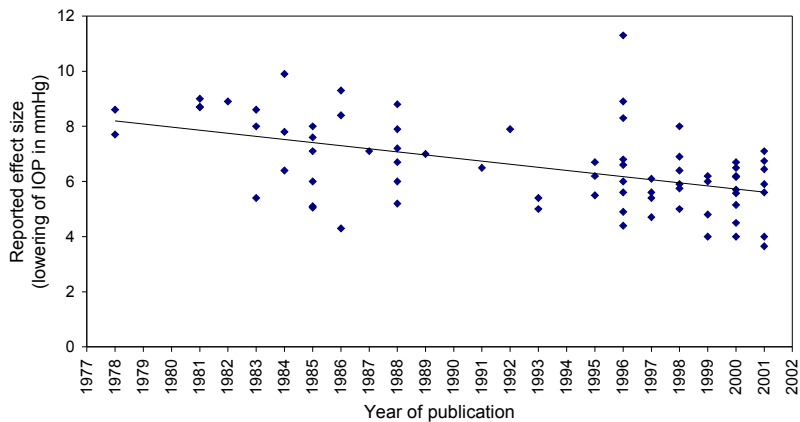**Latanoprost (n=32)**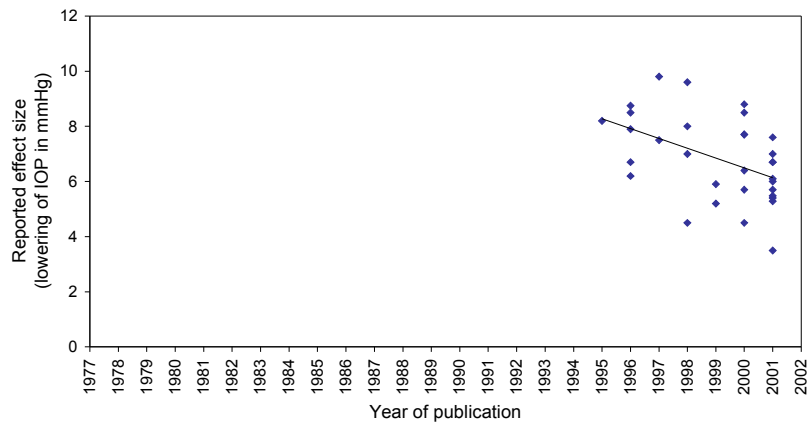

Supplement: 12874_2005_150_MOESM4_ESM.pdf [file 12874_2005_150_MOESM4_ESM.pdf]
